# Supplementary material for: Epidemiology of non‐alcoholic fatty liver disease and non‐alcoholic steatohepatitis in Japan: A focused literature review
Source: PubMed Central journal article supplement (PMC7578337; doi:10.1002/jgh3.12349), 2020-05-05
Supplement: JGH3-4-808-s001.pdf [file JGH3-4-808-s001.pdf]

## Appendix 1 PICOS framework and search strategy

|                        |                                                                                                                                                                                                                                                                                                                                                                    |
|------------------------|--------------------------------------------------------------------------------------------------------------------------------------------------------------------------------------------------------------------------------------------------------------------------------------------------------------------------------------------------------------------|
| <b>PICOS Component</b> | <b>Epidemiology and natural history of NAFLD/NASH in Japan</b>                                                                                                                                                                                                                                                                                                     |
| Population             | Patients with NAFLD/NASH in Japan (primary focus on patients with F3 or F4 disease), including patients with lean NASH.                                                                                                                                                                                                                                            |
| Intervention           | No specific restrictions                                                                                                                                                                                                                                                                                                                                           |
| Comparators            | No specific restrictions                                                                                                                                                                                                                                                                                                                                           |
| Outcomes               | <ul style="list-style-type: none"> <li>• Incidence</li> <li>• Number of cases</li> <li>• Prevalence</li> <li>• Incidence and prevalence of co-morbidities</li> <li>• Patient demographics and clinical characteristics, including presence of comorbidities (e.g. diabetes, cardiovascular and renal disease)</li> <li>• Distribution of fibrosis stage</li> </ul> |
| Study type             | Observational studies (including, but not limited to: epidemiologic surveillance data, case-control studies, cohort studies, follow-up studies, longitudinal studies, cross-sectional studies)                                                                                                                                                                     |
| Country of Interest    | Japan                                                                                                                                                                                                                                                                                                                                                              |
| Language               | English and Japanese                                                                                                                                                                                                                                                                                                                                               |

## Search strategy for English literature

### Search terms for EMBASE (articles, articles-in-press, reviews) via www.embase.com

Date of the search: 04/07/2018

| # | Query                                                                                                                                                                                                                                           | # hits    |
|---|-------------------------------------------------------------------------------------------------------------------------------------------------------------------------------------------------------------------------------------------------|-----------|
| 1 | 'nonalcoholic steatohepatitis':ti,ab OR 'non#alcoholic steatohepatitis':ti,ab OR 'nash':ti,ab                                                                                                                                                   | 15,414    |
| 2 | 'nonalcoholic fatty liver'/exp OR ('f3coholic fatty liver disease' OR 'non#alcoholic fatty liver disease' OR NAFLD OR 'non-alcoholic fatty liver' OR 'non#alcoholic fatty liver' OR NAFL):ti,ab                                                 | 33,640    |
| 3 | #1 OR #2                                                                                                                                                                                                                                        | 37,283    |
| 4 | japan:ti,ab,ff,ca OR japanese:ti,ab,ff,ca OR tokyo:ti,ab,ff,ca OR kyoto:ti,ab,ff,ca OR yokohama:ti,ab,ff,ca OR osaka:ti,ab,ff,ca OR fukuoka:ti,ab,ff,ca OR kobe:ti,ab,ff,ca OR sapporo:ti,ab,ff,ca OR nagoya:ti,ab,ff,ca OR saitama:ti,ab,ff,ca | 1,846,071 |
| 5 | #1 AND #4                                                                                                                                                                                                                                       | 1,734     |
| 6 | #3 AND #4                                                                                                                                                                                                                                       | 2,977     |
| 7 | #5 AND ('article'/it OR 'article in press'/it OR 'review'/it)                                                                                                                                                                                   | 1,001     |
| 8 | #6 AND ('article'/it OR 'article in press'/it OR 'review'/it)                                                                                                                                                                                   | 1,784     |

### Search terms for EMBASE (conference abstracts, papers and reviews) via www.embase.com

Date of the search: 13/07/2018

| # | Query                                                                                                                                                                                                                                           | # hits    |
|---|-------------------------------------------------------------------------------------------------------------------------------------------------------------------------------------------------------------------------------------------------|-----------|
| 1 | 'nonalcoholic steatohepatitis':ti,ab OR 'non#alcoholic steatohepatitis':ti,ab OR 'nash':ti,ab                                                                                                                                                   | 15,465    |
| 2 | 'nonalcoholic fatty liver'/exp OR ('non-alcoholic fatty liver disease' OR 'non#alcoholic fatty liver disease' OR NAFLD OR 'non-alcoholic fatty liver' OR 'non#alcoholic fatty liver' OR NAFL):ti,ab                                             | 33,775    |
| 3 | #1 OR #2                                                                                                                                                                                                                                        | 37,434    |
| 4 | japan:ti,ab,ff,ca OR japanese:ti,ab,ff,ca OR tokyo:ti,ab,ff,ca OR kyoto:ti,ab,ff,ca OR yokohama:ti,ab,ff,ca OR osaka:ti,ab,ff,ca OR fukuoka:ti,ab,ff,ca OR kobe:ti,ab,ff,ca OR sapporo:ti,ab,ff,ca OR nagoya:ti,ab,ff,ca OR saitama:ti,ab,ff,ca | 1,848,348 |
| 5 | #3 AND #4                                                                                                                                                                                                                                       | 2,982     |
| 6 | #5 AND ([conference abstract]/lim OR [conference paper]/lim OR [conference review]/lim)                                                                                                                                                         | 1,044     |
| 7 | #6 AND [2015-2018]/py                                                                                                                                                                                                                           | 473       |
| 8 | [animals]/lim NOT [humans]/lim                                                                                                                                                                                                                  | 5,393,326 |

|   |           |     |
|---|-----------|-----|
| 9 | #7 NOT #8 | 334 |
|---|-----------|-----|

**Search terms for MEDLINE and MEDLINE-IN-PROCESS via www.pubmed.com**

Date of the search: 04/07/2018

| # | Query                                                                                                                                                                                                                                                                                                                                                                           | # hits    |
|---|---------------------------------------------------------------------------------------------------------------------------------------------------------------------------------------------------------------------------------------------------------------------------------------------------------------------------------------------------------------------------------|-----------|
| 1 | “Non-alcoholic fatty liver disease”[MH] OR “non-alcoholic fatty liver disease”[TIAB] OR “non?alcoholic fatty liver disease”[TIAB] OR “NAFLD”[TIAB] OR “non-alcoholic fatty liver”[TIAB] OR “non?alcoholic fatty liver”[TIAB] OR “NAFL”[TIAB]                                                                                                                                    | 14,475    |
| 2 | “Nonalcoholic steatohepatitis”[TIAB] OR “non?alcoholic steatohepatitis”[TIAB] OR “NASH”[TIAB]                                                                                                                                                                                                                                                                                   | 8,778     |
| 3 | #1 OR #2                                                                                                                                                                                                                                                                                                                                                                        | 18,416    |
| 4 | japan[MH] OR japan[TIAB] OR japan[AD] OR japan[PL] OR japanese[TIAB] OR japanese[AD] OR tokyo[MH] OR Tokyo[TIAB] OR Tokyo[AD] OR kyoto[TIAB] OR kyoto[AD] OR yokohama[TIAB] OR yokohama[AD] OR osaka[TIAB] OR osaka[AD] OR fukuoka[TIAB] OR fukuoka[AD] OR kobe[TIAB] OR kobe[AD] OR sapporo[TIAB] OR sapporo[AD] OR nagoya[TIAB] OR nagoya[AD] OR saitama[TIAB] OR saitama[AD] | 1,697,790 |
| 5 | #2 AND #4                                                                                                                                                                                                                                                                                                                                                                       | 1,167     |
| 6 | #3 AND #4                                                                                                                                                                                                                                                                                                                                                                       | 1,822     |

## Search strategy for Japanese literature

### Search terms for Ichushi Web

Date of the search: 04/07/2018

| #  | Query                                              | # hits |
|----|----------------------------------------------------|--------|
| 1  | NASH                                               | 594    |
| 2  | NAFLD                                              | 366    |
| 3  | 非アルコール性脂肪性肝炎                                       | 352    |
| 4  | 非アルコール性脂肪性肝疾患                                      | 349    |
| 5  | 非アルコール性脂肪性肝                                        | 95     |
| 6  | 非アルコール性脂肪性肝障害                                      | 1      |
| 7  | 非アルコール性脂肪肝炎                                        | 352    |
| 8  | 非アルコール性脂肪肝                                         | 360    |
| 9  | 非アルコール性脂肪肝疾患                                       | 14     |
| 10 | #1 OR #2 OR #3 OR #4 OR #5 OR #6 OR #7 OR #8 OR #9 | 636    |

## Appendix 2 PRISMA flowchart

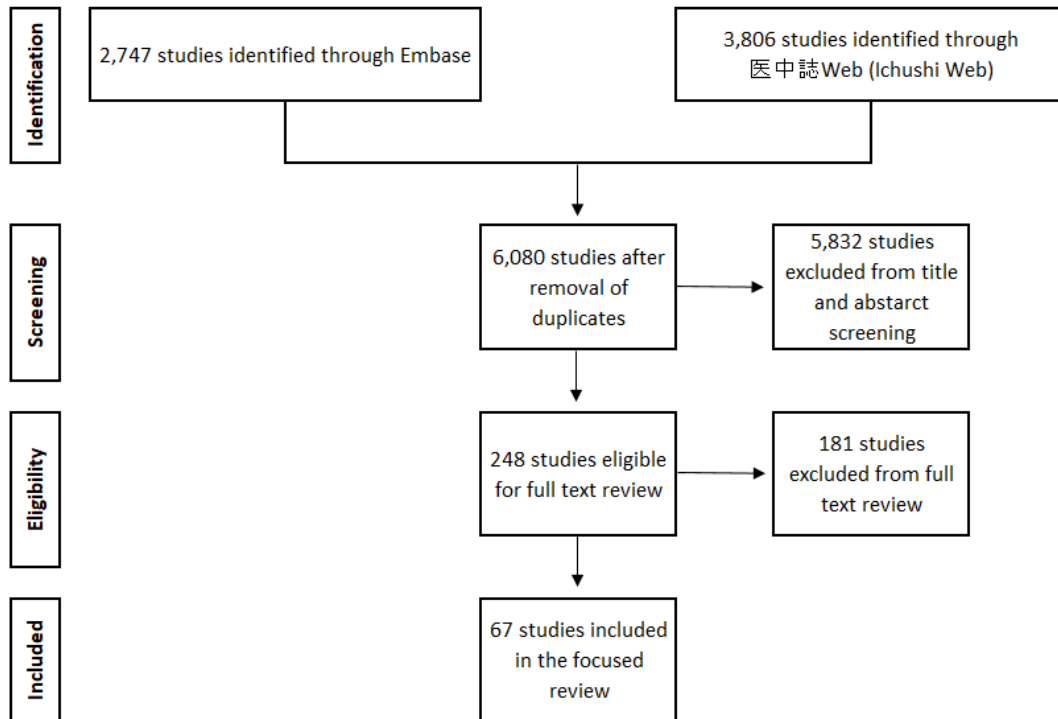

### Appendix 3 Summary of study characteristics

| Author                                   | Type of study   | Prefecture/<br>city  | Data Source                                                                                                        | Study Period   | Population                  | Method of<br>NAFLD/ NASH<br>diagnosis       | Sample Size | Mean/<br>median<br>Age<br>(years) | Gender<br>(% males) |
|------------------------------------------|-----------------|----------------------|--------------------------------------------------------------------------------------------------------------------|----------------|-----------------------------|---------------------------------------------|-------------|-----------------------------------|---------------------|
| <b>Nishioji,<br/>2015</b> <sup>50</sup>  | Cross-sectional | Kyoto                | Health care division of Kyoto Second Red Cross Hospital                                                            | 2011 -<br>2012 | General population          | NR                                          | 3,271       | NR                                | 44%                 |
| <b>Jimba,<br/>2005</b> <sup>7</sup>      | Cross-sectional | Kurihashi            | Saitama-ken Saiseikai Kurihashi (SSK) Hospital                                                                     | 2002 -<br>2003 | Impaired glucose metabolism | Abdominal US                                | 1,950       | 49                                | 69%                 |
| <b>Hamaguchi,<br/>2005</b> <sup>11</sup> | Prospective     | Gifu                 | Gifu University School of Medicine                                                                                 | 2002 -<br>2003 | General population          | Abdominal US                                | 4401        | 47.6                              | 59%                 |
| <b>Yatsuji,<br/>2009</b> <sup>27</sup>   | Prospective     | Tokyo; Tokyo         | Tokyo Women's Medical University                                                                                   | 1990 -<br>2006 | NASH + cirrhosis            | Liver biopsy                                | 68          | 62.7                              | 43%                 |
| <b>Yasui,<br/>2011</b> <sup>20</sup>     | Cross-sectional | Kyoto and Nara       | Hospital of Kyoto Prefectural University of Medicine and Nara City Hospital                                        | 2001 -<br>2006 | NAFLD                       | Liver biopsy                                | 174         | 54                                | 59%                 |
| <b>Arase,<br/>2011</b> <sup>51</sup>     | Retrospective   | Tokyo                | Department of Hepatology and/or Health Management Center of Toranomon                                              | 1997 -<br>2007 | NALFD                       | Liver biopsy                                | 5,561       | 48                                | 88%                 |
| <b>Arase,<br/>2012</b> <sup>52</sup>     | Retrospective   | Tokyo                | Department of Hepatology and/or Health Management Center, Toranomon                                                | 1997 -<br>2007 | NALFD                       | Liver biopsy                                | 3,200       | 62.5                              | 75%                 |
| <b>Chan,<br/>2018</b> <sup>32</sup>      | Cross-sectional | Two centres in Japan | Yotsuya Medical Cube/Gunma University Graduate School of Medicine, and Yokohama City University School of Medicine | 2009 -<br>2016 | NAFLD and NASH              | NAFLD – abdominal US<br>NASH – Liver biopsy | 112         | NR                                | NR                  |

|                                      |                 |                        |                                                                                         |             |                            |              |            |              |            |
|--------------------------------------|-----------------|------------------------|-----------------------------------------------------------------------------------------|-------------|----------------------------|--------------|------------|--------------|------------|
| <b>Eguchi, 2012</b> <sup>8</sup>     | Retrospective   | Three centres in Japan | Eguchi Hospital Health, Kawamura Clinic Heath Center, and Kochi Medical School Hospital | 2009 - 2010 | General population         | Abdominal US | 5,075      | 50           | 52%        |
| <b>Hashimoto, 2004</b> <sup>39</sup> | Retrospective   | Tokyo                  | Tokyo Women's Medical University                                                        | 1989 - 2003 | NASH + HCC                 | Liver biopsy | 8          | 68           | 37%        |
| <b>Hashimoto, 2005</b> <sup>13</sup> | Prospective     | Tokyo                  | Tokyo Women's Medical University or an affiliated hospital                              | 1990 - 2004 | NAFLD                      | Liver biopsy | 247        | 53           | 53%        |
| <b>Hashimoto, 2009</b> <sup>28</sup> | Prospective     | Tokyo                  | Tokyo Women's Medical University or an affiliated hospital                              | 1990 - 2004 | NASH + HCC                 | Liver biopsy | 348        | 50           | 41%        |
| <b>Hashizume, 2007</b> <sup>46</sup> | Retrospective   | Maebashi               | Gunma University Graduate School of Medicine and affiliated hospitals                   | 2000 - 2005 | NASH +HCC                  | NR           | NR         | NR           | NR         |
| <b>Hashizume, 2013</b> <sup>38</sup> | Prospective     | Maebashi               | Gunma University Graduate School of Medicine and affiliated hospitals                   | 2003        | NASH                       | NR           | 39         | 68           | 0          |
| <b>Honda, 2016</b> <sup>31</sup>     | Cross-sectional | National               | University Hospitals of Hiroshima Kurume and Yokahoma                                   | NR          | NAFLD + non-obese vs obese | NR           | 134 vs 406 | 56.6 vs 48.5 | 43% vs 56% |
| <b>Hyogo, 2008</b> <sup>19</sup>     | Prospective     | Hiroshima              | Hiroshima University Hospital                                                           | NR          | NASH + dyslipidemi a       | NR           | 31         | 52.5         | 65%        |
| <b>Iida, 2015</b> <sup>40</sup>      | Retrospective   | Meiwa                  | Meiwa Hospital                                                                          | 2001 - 2013 | NASH + HCC                 | NR           | 40         | 71.6         | 73%        |
| <b>Kang, 2018</b> <sup>53</sup>      | Retrospective   | Sapporo                | A tertiary hospital in Sapporo                                                          | 1998 - 2016 | NAFLD + Cirrhosis          | Abdominal US | 100        | NR           | NR         |
| <b>Kawada, 2009</b> <sup>54</sup>    | Cross-sectional | Osaka                  | Osaka Medical Center for Cancer and Cardiovascular Diseases.                            | 1990 - 2016 | NASH + HCC                 | Abdominal US | 807        | 73           | NR         |
| <b>Kawaguchi, 2018</b> <sup>55</sup> | Prospective     | National               | 17 medical institutions in Japan                                                        | 2000 - 2014 | NAFLD +HCC                 | NR           | 247        | 71           | 65%        |
| <b>Kinoshita, 2016</b> <sup>42</sup> | Prospective     | Osaka                  | Osaka City University Hospital                                                          | 1995 - 2014 | NASH + mHCC                | NR           | 34         | 58           | 56%        |

|                                      |                 |             |                                                     |             |                  |              |       |       |     |
|--------------------------------------|-----------------|-------------|-----------------------------------------------------|-------------|------------------|--------------|-------|-------|-----|
| <b>Kikuchi, 2009</b> <sup>56</sup>   | Retrospective   | Meiwa       | Meiwa Hospital                                      | 2001 - 2005 | NASH + HCC       | NR           | 10    | 70.91 | 70% |
| <b>Kawamura, 2012</b> <sup>57</sup>  | Retrospective   | Tokyo       | Toranomon Hospital                                  | 1997 - 2010 | NAFLD            | Abdominal US | 6,508 | 49    | 88% |
| <b>Tokushige, 2010</b> <sup>29</sup> | Retrospective   | Tokyo       | Tokyo Women's Medical University                    | 1990 - 2007 | NASH + HCC       | Liver biopsy | 34    | 70.14 | 62% |
| <b>Tokushige, 2015</b> <sup>58</sup> | Retrospective   | National    | 15 tutorial hospitals in Japan                      | 2000 - 2013 | NAFLD + HCC      | NR           | 209   | 72    | 70% |
| <b>Tokushige, 2013</b> <sup>59</sup> | Retrospective   | National    | National Survey                                     | 2006 - 2009 | NAFLD + HCC      | NR           | 292   | 72    | 62% |
| <b>Toshikuni, 2017</b> <sup>35</sup> | Retrospective   | National    | National Survey                                     | 2009 - 2011 | NASH             | NR           | 581   | 54    | 51% |
| <b>Wakai, 2011</b> <sup>60</sup>     | Retrospective   | Niigata     | Niigata University Medical and Dental Hospital      | 1990 - 2007 | NAFLD + HCC      | NR           | 17    | 65    | 58% |
| <b>Yasui, 2011</b> <sup>30</sup>     | Cross-sectional | National    | 15 hepatology centers in the Japan NASH Study Group | 1993 - 2010 | NASH + HCC       | NR           | 87    | 72    | 62% |
| <b>Yasui 2012</b> <sup>49</sup>      | Retrospective   | Multicenter | NR                                                  | NR          | NASH + HCC       | NR           | 19    | 65    | 47% |
| <b>Yatsuji, 2009</b> <sup>22</sup>   | Cross-sectional | Tokyo       | Tokyo Women's Medical University                    | 1991 - 2005 | NASH             | Liver biopsy | 193   | 53    | 56% |
| <b>Kodama 2013</b> <sup>26</sup>     | Prospective     | Tokyo       | Tokyo Medical University                            | 1990 - 2010 | NASH + Cirrhosis | Liver biopsy | 72    | 63.5  | 32% |
| <b>Komeda 2005</b> <sup>6</sup>      | Prospective     | Kyoto       | Kyoto University Hospital                           | N/R         | NASH             | Liver biopsy | 26    | 56.6  | 38% |
| <b>Kongkarnka 2009</b> <sup>23</sup> | Retrospective   | Nara        | Nara Medical University                             | 2003 - 2008 | NASH             | NR           | 50    | 54.66 | 52% |
| <b>Michitaka 2010</b> <sup>15</sup>  | Retrospective   | Nationwide  | 58 hospitals in Japan                               | N/R         | NASH +cirrhosis  | Liver biopsy | 647   | 66.6  | 40% |



|                                        |                 |            |                                                          |                |                                            |                        |       |                  |      |
|----------------------------------------|-----------------|------------|----------------------------------------------------------|----------------|--------------------------------------------|------------------------|-------|------------------|------|
| <b>Nagaoki<br/>2012</b> <sup>41</sup>  | Retrospective   | Hiroshima  | Hiroshima<br>University Hospital                         | 1995 -<br>2009 | NASH +<br>HCC                              | NR                     | 17    | 66.3             | 65%  |
| <b>Nakajima<br/>2015</b> <sup>61</sup> | Cross-sectional | N/R        | N/R                                                      | N/R            | NASH                                       | NR                     | 51    | 59               | 45%  |
| <b>Kogiso<br/>2014</b> <sup>44</sup>   | Retrospective   | Tokyo      | Hiroshima<br>University Hospital                         | 1991 -<br>2012 | NASH                                       | NR                     | 691   | NR               | NR   |
| <b>Nakamura<br/>2008</b> <sup>24</sup> | Prospective     | Tokyo      | Tokyo Medical University                                 | 1993 -<br>2006 | NASH                                       | Liver biopsy           | 72    | 62               | 49%  |
| <b>Nakano<br/>2013</b> <sup>17</sup>   | Retrospective   | Tochigi    | Dokkyo Medical University                                | 1991 -<br>2011 | NAFLD                                      | Liver biopsy           | 52    | 48               | 40%  |
| <b>Osawa<br/>2015</b> <sup>62</sup>    | Retrospective   | Okayama    | Okayama University hospital                              | 2011 -<br>2013 | CAD/CAB<br>G                               | Computed<br>tomography | 414   | 64               | 51%  |
| <b>Seki<br/>2016</b> <sup>45</sup>     | Prospective     | Tokyo      | Yotsuya Medical Cube                                     | 2009 -<br>2011 | NAFLD +<br>Obese +<br>bariatric<br>surgery | Liver biopsy           | 102   | 42.7             | 54%  |
| <b>Seko<br/>2015</b> <sup>63</sup>     | Retrospective   | Kyoto      | Kyoto Prefectural University of Medicine                 | 1999 -<br>2014 | NASH                                       | Liver biopsy           | 52    | 68               | 42.% |
| <b>Seko<br/>2017</b> <sup>33</sup>     | Retrospective   | Kyoto      | Kyoto Prefectural University of Medicine                 | 1999 -<br>2013 | NAFLD                                      | Liver biopsy           | 312   | 59               | 51%  |
| <b>Shima<br/>2015</b> <sup>64</sup>    | Retrospective   | Osaka      | Saiseikai Suita Hospital                                 | 2007 -<br>2012 | NAFLD<br>male vs<br>female                 | Liver biopsy           | 570   | 51.6 vs<br>61.8% | NR   |
| <b>Sumida<br/>2013</b> <sup>21</sup>   | Retrospective   | Nara       | Nara Medical University                                  | 2002 -<br>2008 | NASH                                       | Liver biopsy           | 17    | 67               | 24%  |
| <b>Suzuki<br/>2013</b> <sup>73</sup>   | Retrospective   | Yokohama   | Yokohama City University Graduate School of<br>Medicine, | 2006 -<br>2007 | NAFLD                                      | Liver biopsy           | 36    | 56               | 36%  |
| <b>Suzuki<br/>2013</b> <sup>14</sup>   | Retrospective   | Nationwide | 48 hospitals in Japan                                    | 2011           | NASH                                       | Liver biopsy           | 1,015 | 67               | 43%  |

|                                     |                 |          |                                                   |             |                                  |              |               |             |               |
|-------------------------------------|-----------------|----------|---------------------------------------------------|-------------|----------------------------------|--------------|---------------|-------------|---------------|
| <b>Tada 2018</b> <sup>37</sup>      | Retrospective   | Ogaki    | Ogaki Municipal Hospital and Kochi Medical School | 1999 - 2013 | NAFLD                            | Liver biopsy | 170           | 54.5        | 47%           |
| <b>Yoneda 2010</b> <sup>48</sup>    | Prospective     | Yokohama | Yokohama City University Hospital                 | N/R         | NASH +<br>dyslipidemi<br>a       | Liver biopsy | 10            | 51          | 60%           |
| <b>Ikarashi 2017</b> <sup>25</sup>  | Cross-sectional | NR       | NR                                                | NR          | Lean<br>NASH vs<br>Obese<br>NASH | Liver biopsy | 284 vs<br>524 | 57 vs<br>49 | 45% vs<br>58% |
| <b>Urabe 2015</b> <sup>18</sup>     | Retrospective   | Osaka    | Osaka University Hospital                         | 1998 - 2009 | NASH                             | Liver biopsy | 134           | 55.7        | 31%           |
| <b>Hamaguchi 2007</b> <sup>47</sup> | Prospective     | Gifu     | Murakami Memorial Hospital,                       | 1998        | General<br>population            | Abdominal US | 1,647         | NR          | NR            |
| <b>Arase 2009</b> <sup>65</sup>     | Retrospective   | Tokyo    | Toranomon Hospital,                               | 1997 - 2007 | NAFLD                            | Abdominal US | 6,003         | 48.8        | 88%           |
| <b>Nakamuta 2005</b> <sup>66</sup>  | Prospective     | Kyushu   | Kyushu University Hospital                        | 2003 - 2004 | Steatosis<br>LDLT<br>donors      | Liver biopsy | 7             | 38.8        | 90%           |
| <b>Oza 2009</b> <sup>67</sup>       | Prospective     | Eguchi   | Eguchi Hospital                                   | 2007 - 2008 | NAFLD                            | Abdominal US | 61            | 62.6        | 49%           |
| <b>Tsunoda 2016</b> <sup>16</sup>   | Prospective     | Tokyo    | Meiji Yasuda Shinjuku Medical Center              | 2005 - 2007 | NAFL                             | NR           | 4,840         | NR          | NR            |
| <b>Nakagami 2009</b> <sup>43</sup>  | Cross-sectional | Saitama  | Saiseikai Kurihas                                 | 2002 - 2003 | NAFLD +<br>Male vs<br>female     | Abdominal US | 402 vs<br>130 | 48 vs<br>51 | NR            |
| <b>Tada 2017</b> <sup>68</sup>      | Retrospective   | Ogaki    | Ogaki Municipal Hospital                          | 2006 - 2015 | NAFLD                            | Abdominal US | 4,073         | 61          | 54%           |
| <b>Sumida 2011</b> <sup>69</sup>    | Cross-sectional | Kyoto    | Kyoto medical plant                               | 2009 - 2010 | NAFLD                            | Abdominal US | 4,130         | 52.5        | 79%           |

|                                         |                 |            |                                    |                |                            |              |        |               |               |
|-----------------------------------------|-----------------|------------|------------------------------------|----------------|----------------------------|--------------|--------|---------------|---------------|
| <b>Suzuki<br/>2005</b> <sup>12</sup>    | Retrospective   | Nationwide | NR                                 | 1997 -<br>2002 | NAFLD                      | Blood tests  | 529    | 35            | 73%           |
| <b>Hamaguchi<br/>2005</b> <sup>70</sup> | Retrospective   | Gifu       | Murakami Memorial Hospital         | 2001 -<br>2003 | NAFLD<br>male vs<br>female | Abdominal US | 3,876  | 47.9 vs<br>51 | 63% vs<br>37% |
| <b>Nishioji<br/>2014</b> <sup>9</sup>   | Cross-sectional | Kyoto      | Kyoto Second Red<br>Cross Hospital | 2011 -<br>2012 | NAFLD                      | Abdominal US | 3,271  | 59            | 67%           |
| <b>Tateishi<br/>2015</b> <sup>71</sup>  | Retrospective   | Nationwide | 53 tertiary care centres in Japan  | 1991 -<br>2015 | NAFLD                      | Abdominal US | 5,326  | 70            | 75.5%         |
| <b>Tokushige<br/>2011</b> <sup>72</sup> | Cross-sectional | Nationwide | 115 hospitals in Japan             | 2006 -<br>2009 | NAFLD-<br>HCC              | Liver biopsy | 14,530 | 72            | 62%           |

NR: Non-reported; NAFLD: Nonalcoholic fatty liver disease; NASH: Nonalcoholic steatohepatitis; US: Ultrasound; HCC: Hepatocellular carcinoma; mHCC: Metastatic Hepatocellular carcinoma
